# Supplementary material
Source: PubMed Central journal article supplement (PMC4707077)
Supplement: NIHMS736939-supplement-1.pdf [file NIHMS736939-supplement-1.pdf]

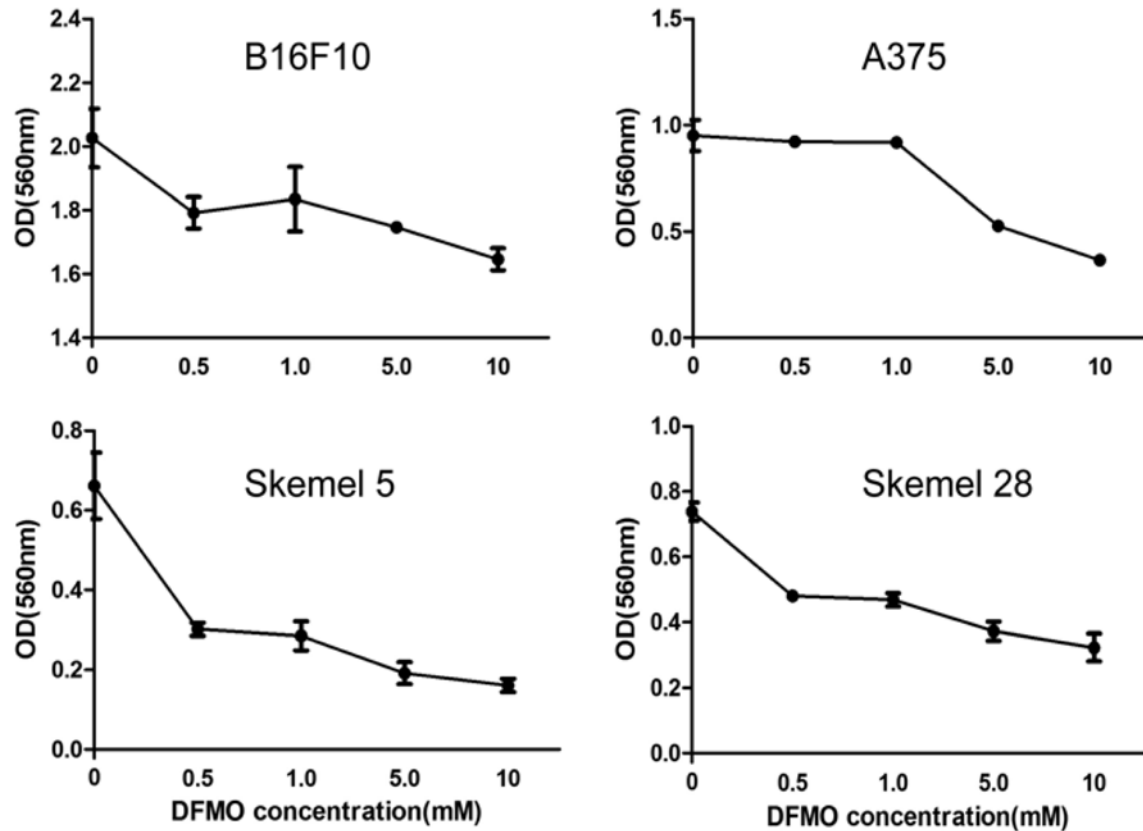

**Supplemental Figure 1. *In vitro* growth inhibition of melanoma cells by DFMO.** Murine B16F10, human A375, Skemel 5 and Skemel 28 melanoma cells were incubated for 3-5 days in culture with DFMO at the indicated concentrations. Cell growth was determined by the MTT assay from triplicate wells. Data shown are mean  $\pm$  SD.

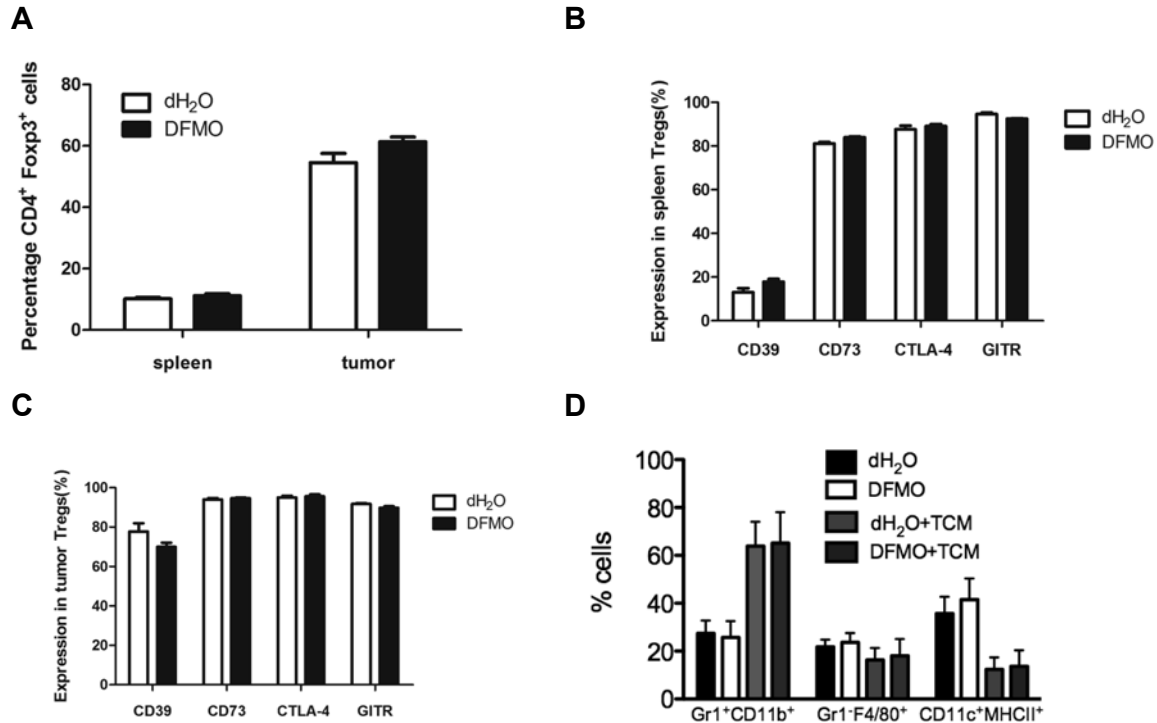

**Supplemental Figure 2. The effect of DFMO on tumor-associated CD4<sup>+</sup>Foxp3<sup>+</sup> regulatory T cells (Tregs) and MDSC differentiation. (A)** Percent CD4<sup>+</sup>Foxp3<sup>+</sup> T cells in spleen and tumor infiltrates. Percent CD39<sup>+</sup>, CD73<sup>+</sup>, CTLA-4<sup>+</sup> and GITR<sup>+</sup> cells among Tregs in spleen **(B)** and tumor infiltrates **(C)**. Cells were collected from B16F10-bearing DFMO treated or control mice 14 days after tumor inoculation (3 mice per group). **(D)** BM cells were cultured with GM-CSF and IL-4 for 5 days in complete culture medium or in the TCM in the presence of DFMO or dH<sub>2</sub>O as controls. The cell phenotypes were examined by flow cytometry. Data (mean ± SEM) are representative of 2 independent experiments.

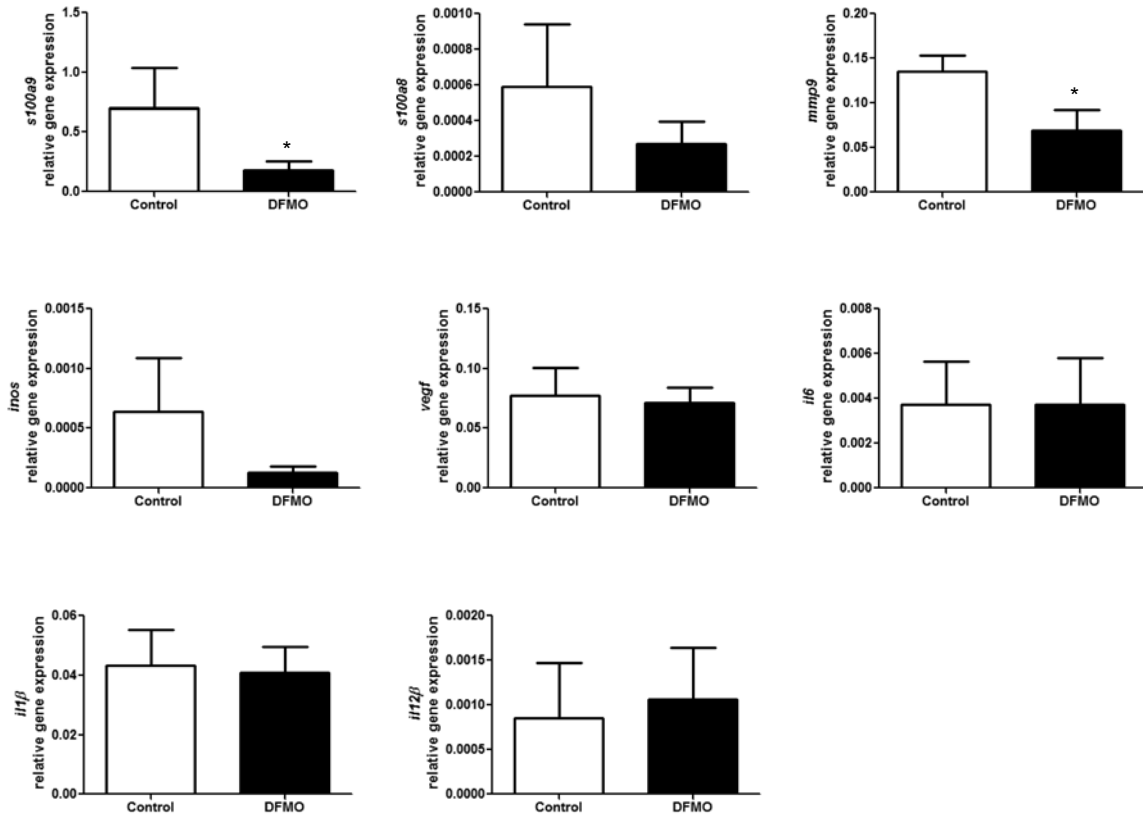

**Supplemental Figure 3. Altered gene expression in MDSCs following DFMO treatment.** Bone marrow cells were cultured with GM-CSF and IL-6 in the presence or absence (as control) of DFMO at 10 mM for 4 d, and Gr1<sup>+</sup>CD11b<sup>+</sup> MDSCs were selected using anti-CD11b magnetic beads. Expression levels of a series of indicated genes associated with MDSC activity were measured by real-time quantitative RT-PCR. GAPDH expression was measured for normalization. One representative of two experiments is shown.

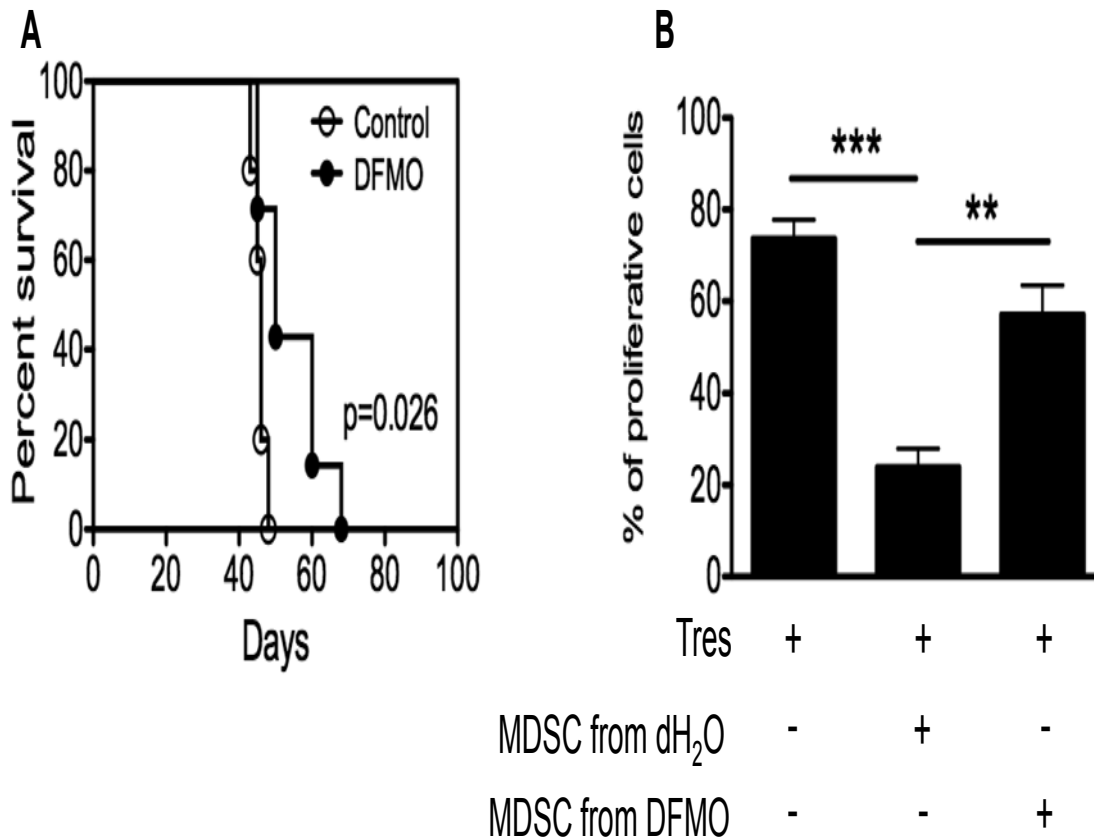

**Supplemental Figure 4. DFMO treatment increases the survival of ID8-bearing mice.** (A) ID8-OVA cells ( $10^7$ ) were injected i.p. into C57BL/6 mice (8 mice per group). DFMO was administered as a 1% solution in drinking dH<sub>2</sub>O to mice starting 7 days after tumor injection. Mice fed with dH<sub>2</sub>O without DFMO were used as controls. Mice survival was monitored every 3 days. (B) Suppressive activity of MDSCs as shown by quantification of eFluor450-labeled CD4<sup>+</sup> T responder cells (Tres) cocultured with the indicated Gr1<sup>+</sup>CD11b<sup>+</sup> MDSCs from DFMO-treated tumor-bearing mice versus control mice. The ratio of T cell/MDSC was 2:1. \*\*,  $p < 0.01$ ; \*\*\*,  $p < 0.001$  (3 mice per group).
